# Supplementary material for: Preparation of Mg, Ca, or Sr-included mesoporous silica from glass bottle waste for recovery of rare earth metal elements
Source: Royal Society of Chemistry journal article supplement (doi:10.1039/d4nj00043a), 2024-01-01
Supplement: d4nj00043a1.pdf [file d4nj00043a1.pdf]

## Electronic Supplementary Information

Preparation of Mg, Ca, or Sr-included mesoporous silica from glass bottle waste for recovery of rare earth metal elements

Takahiro Takei,\* Kousuke Takimoto, Tomohiro Takabayashi, Norio Saito and Nobuhiro Kumada

Center for Crystal Science and Technology, University of Yamanashi, 7-32 Miyamae,  
Kofu, Yamanashi 400-0021, Japan

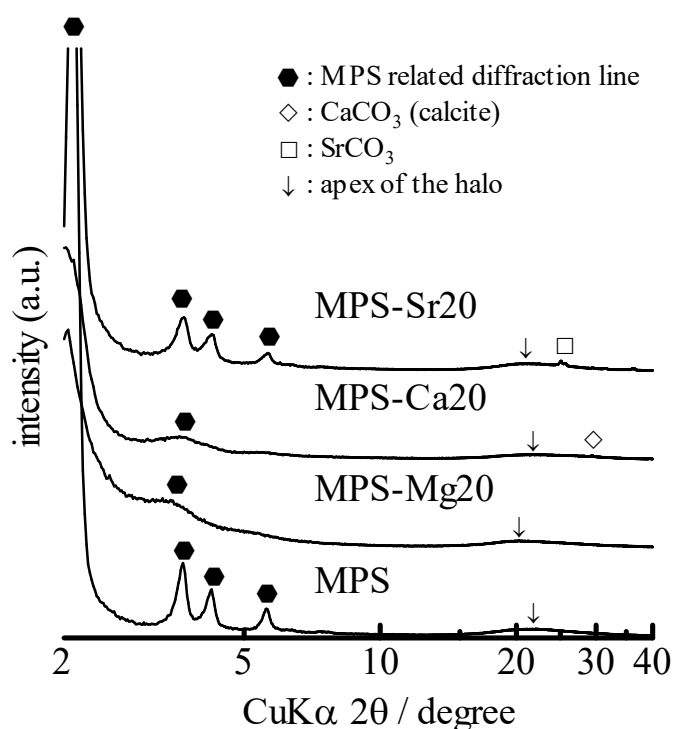

Figure S1 XRD patterns of MPS, MPS-Mg<sub>20</sub>, MPS-Ca<sub>20</sub>, and MPS-Sr<sub>20</sub> hybrid prepared at pH of 10.5 on logarithmic 2 $\theta$ .

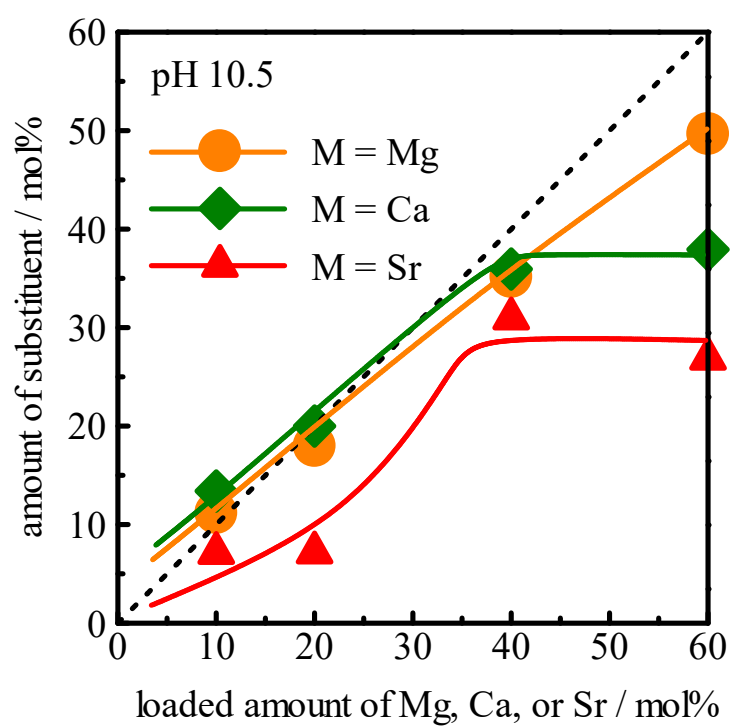

Figure S2 Relationships between loaded amount and actual amount of substituent, Mg, Ca, or Sr

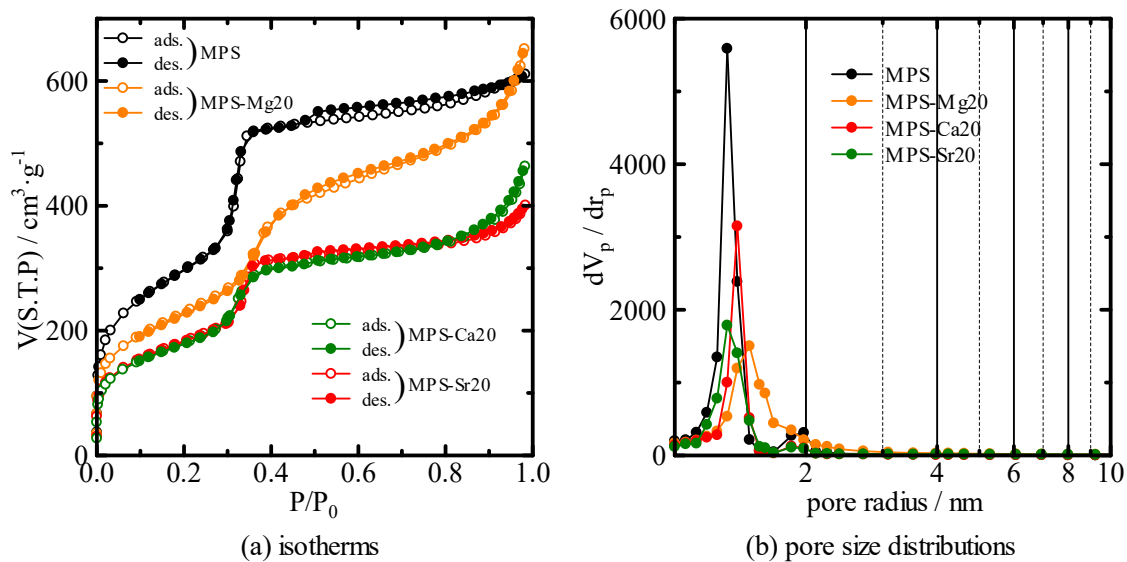

Figure S3 Isotherms and pore size distributions of MPS, MPS-Mg20, MPS-Ca20, and MPS-Sr20

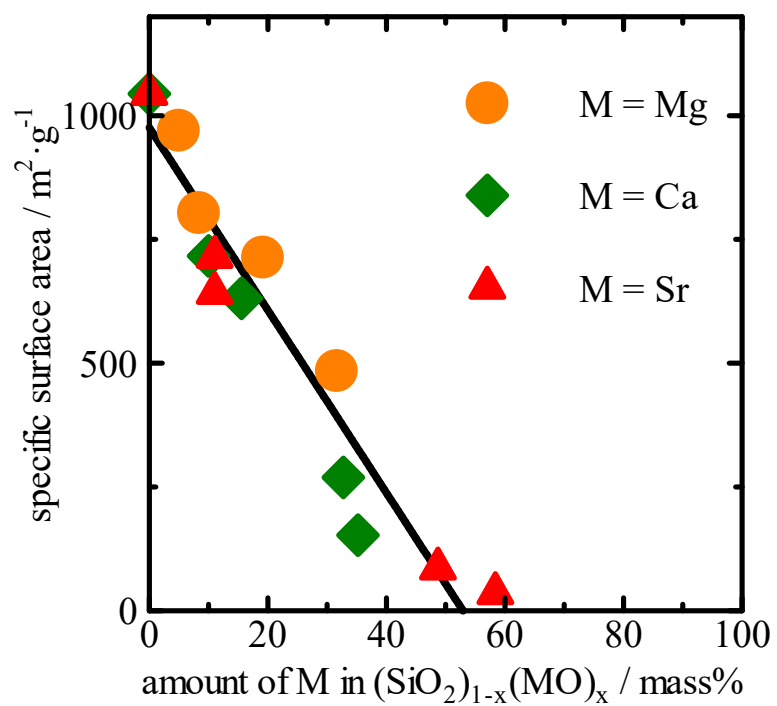

Figure S4 Relationships between the mass fraction of the substituent and specific surface area.

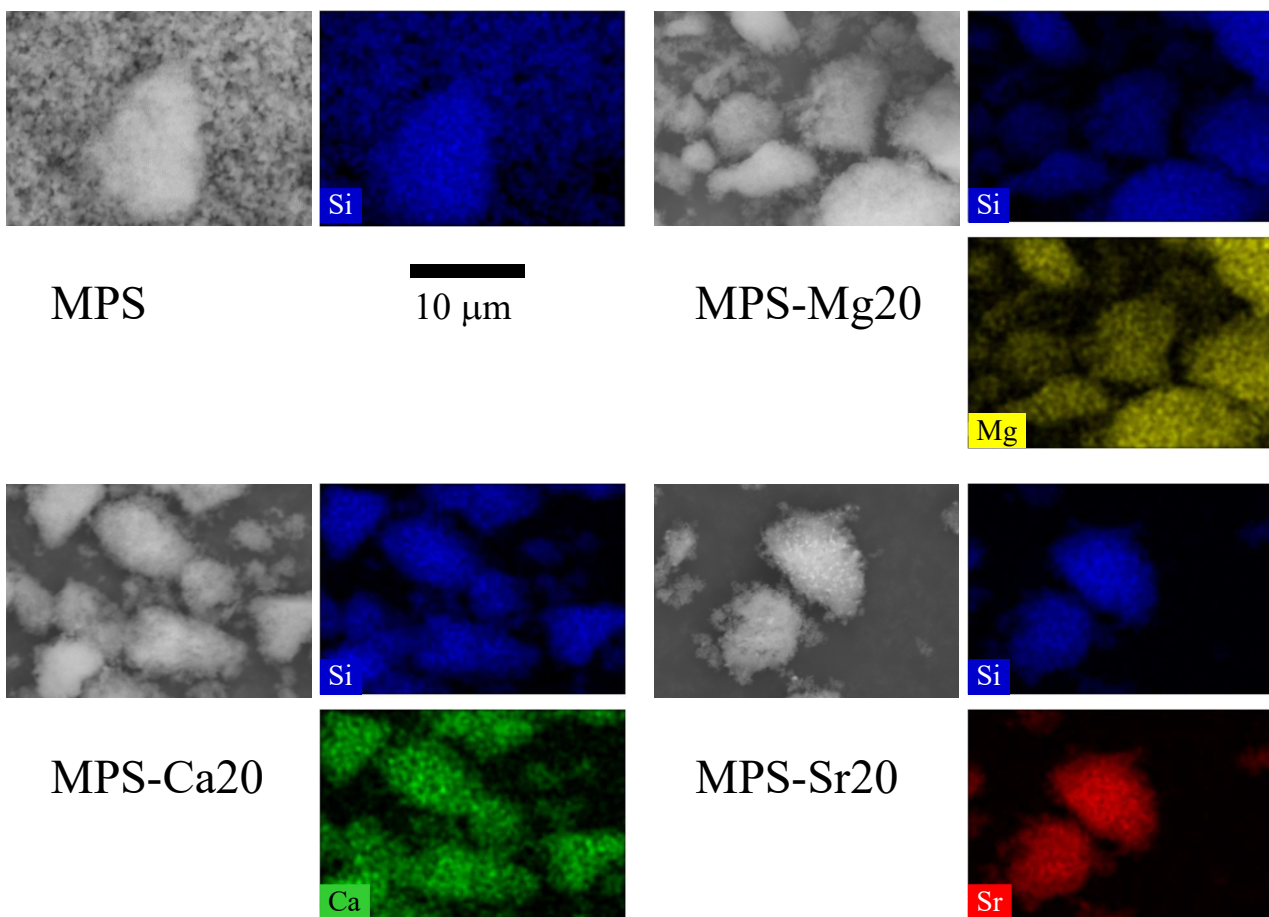

Figure S5 SEM micrographs and elemental mapping of MPS, MPS-Mg<sub>20</sub>, -Ca<sub>20</sub>, and -Sr<sub>20</sub>

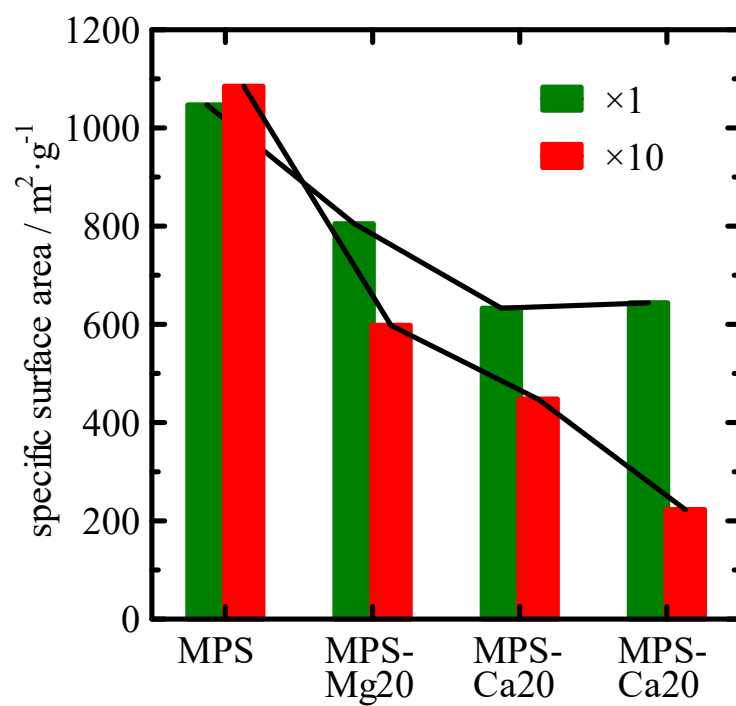

Figure S6 A change in specific surface area of MPS, MPS-Mg20, -Ca20, and -Sr20 prepared from the waste glass with a scale-up by 10.

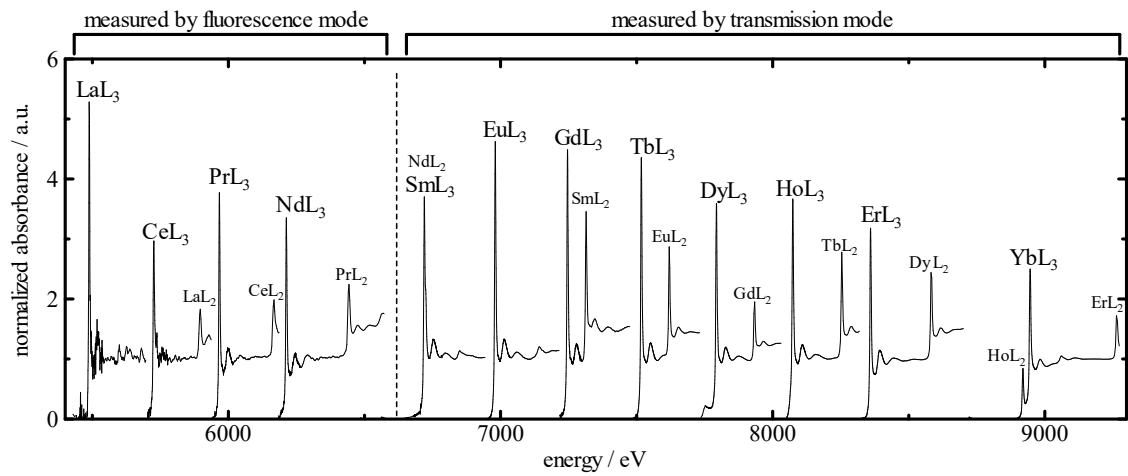

Figure S7 Wide-range XAFS spectra of lanthanoid elements in the MPS-hybrid after ion exchange treatment.

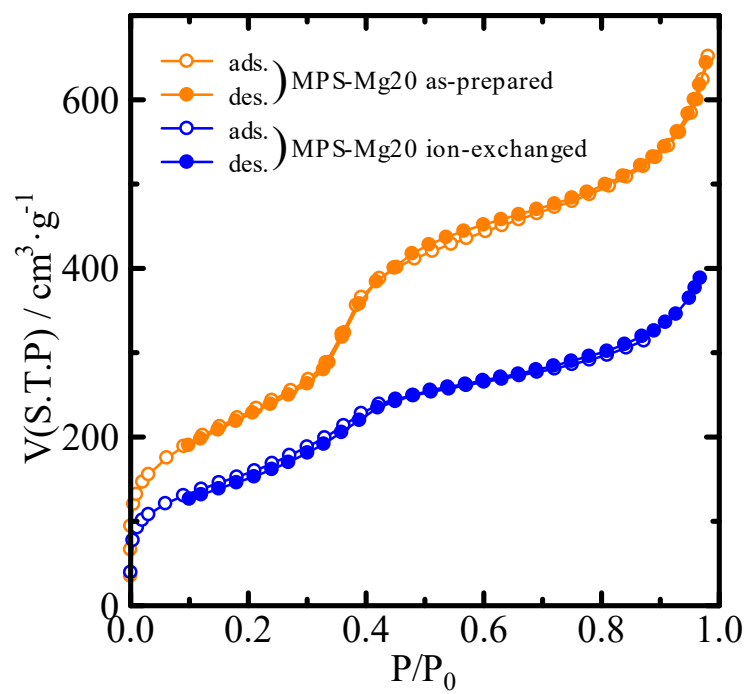

Figure S8 Isotherms of the as-prepared and the ion-exchanged MPS-Mg20
